# Supplementary material for: Radiation-induced curcumin release from curcumin–chitosan polymer films
Source: PubMed Central journal article supplement — RSC Adv. 2020 Apr 23;10(27):16110–7. doi: 10.1039/d0ra00144a (PMC9052875; doi:10.1039/d0ra00144a), 2020-04-23
Supplement: RA-010-D0RA00144A-s001.pdf [file RA-010-D0RA00144A-s001.pdf]

## ***Supporting Information for:***

### **Radiation-induced curcumin release from Curcumin-chitosan Polymer Films**

Rajat Chauhan, Kelsey Kinney, Archana Akalkotkar, Betty M. Nunn, Robert S. Keynton, Patricia A. Soucy\*, Martin G O'Toole\*

Department of Bioengineering, University of Louisville, Louisville, KY, 40292, United States

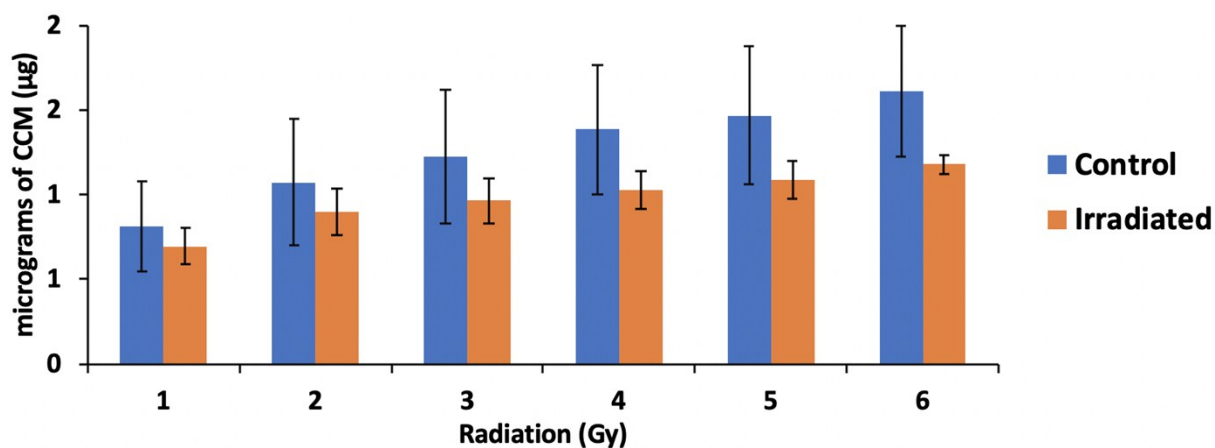

Fig. S1. Plot of micrograms of curcumin concentrations released from chitosan curcumin (doped) films at varying  $\gamma$ -radiation doses of 1-6 Gy (orange bars) and non-irradiated controls (blue bars) kept for each radiation interval in PBS solutions.
